# Supplementary material for: Synthesis, characterization and the effect of temperature on different physicochemical properties of protic ionic liquids
Source: Royal Society of Chemistry journal article supplement (doi:10.1039/c5ra07656k), 2015-01-01

## SUPPORTING MATERIALS FOR PILs

*1*-methyl piperidinium hydrgensulfate [MPip][HSO<sub>4</sub>]

<sup>1</sup>H NMR Spectra

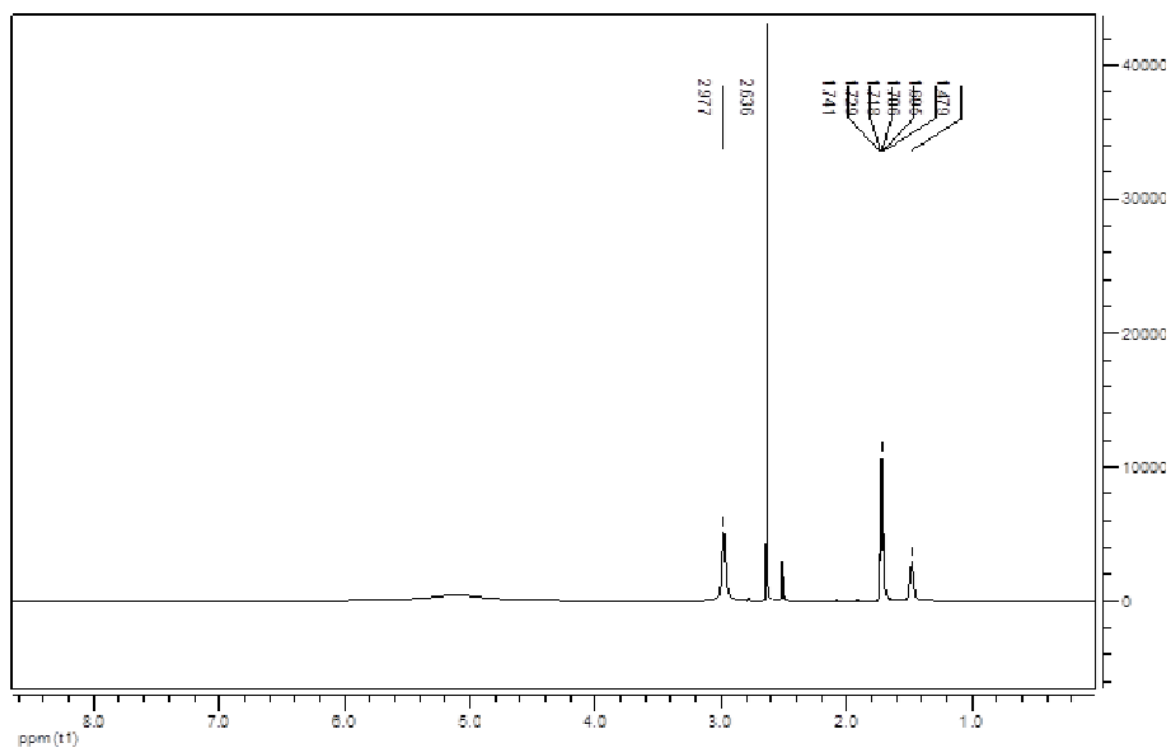

<sup>13</sup>C NMR – Spectra

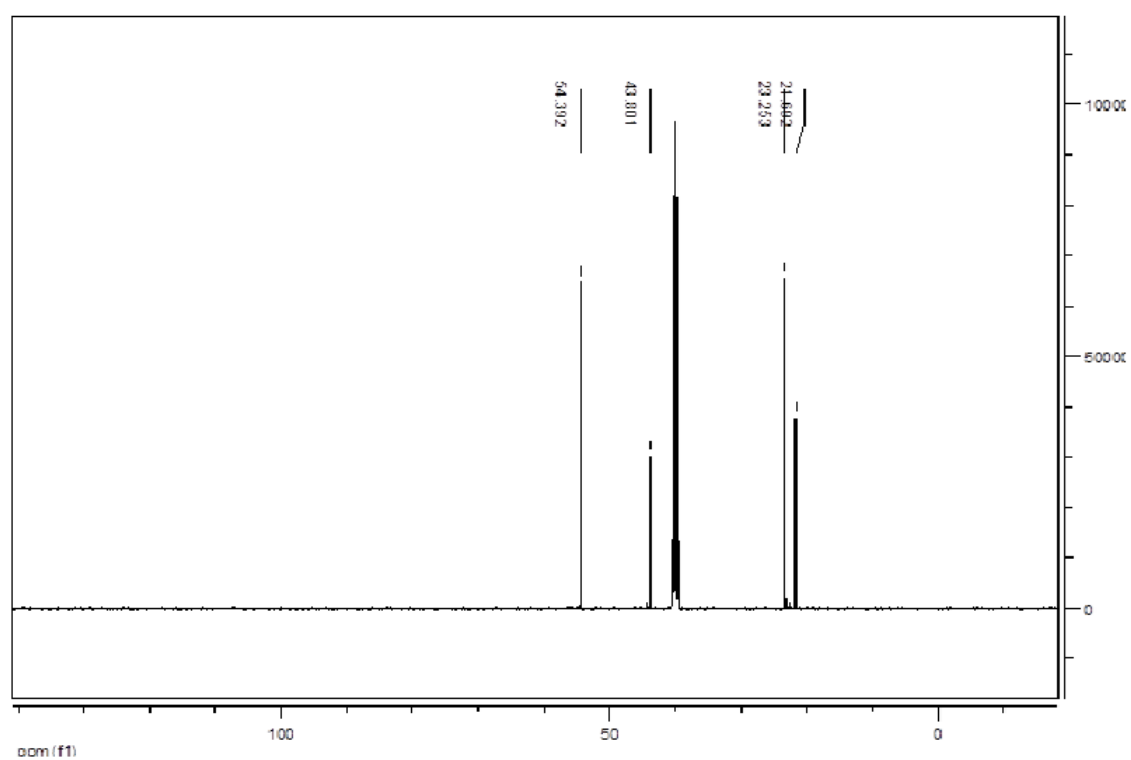

4-methyl pyridinium hydrogensulfate [MPy][HSO<sub>4</sub>]

<sup>1</sup>H NMR Spectra

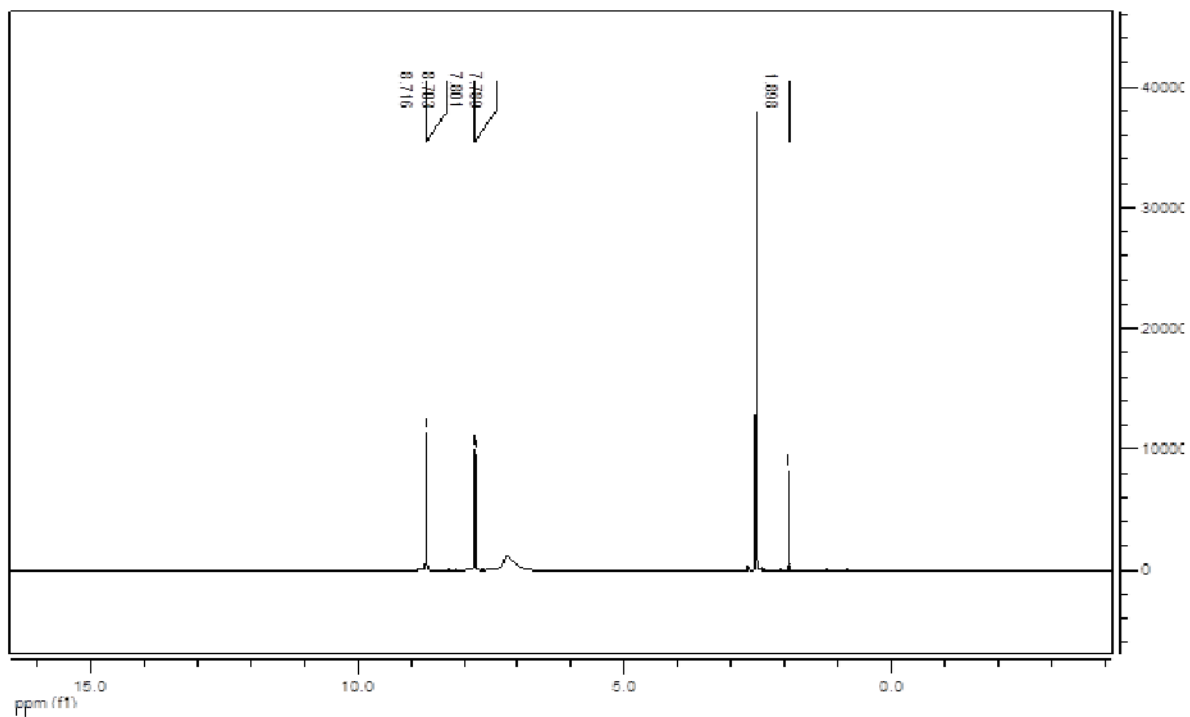

<sup>13</sup>C NMR – Spectra

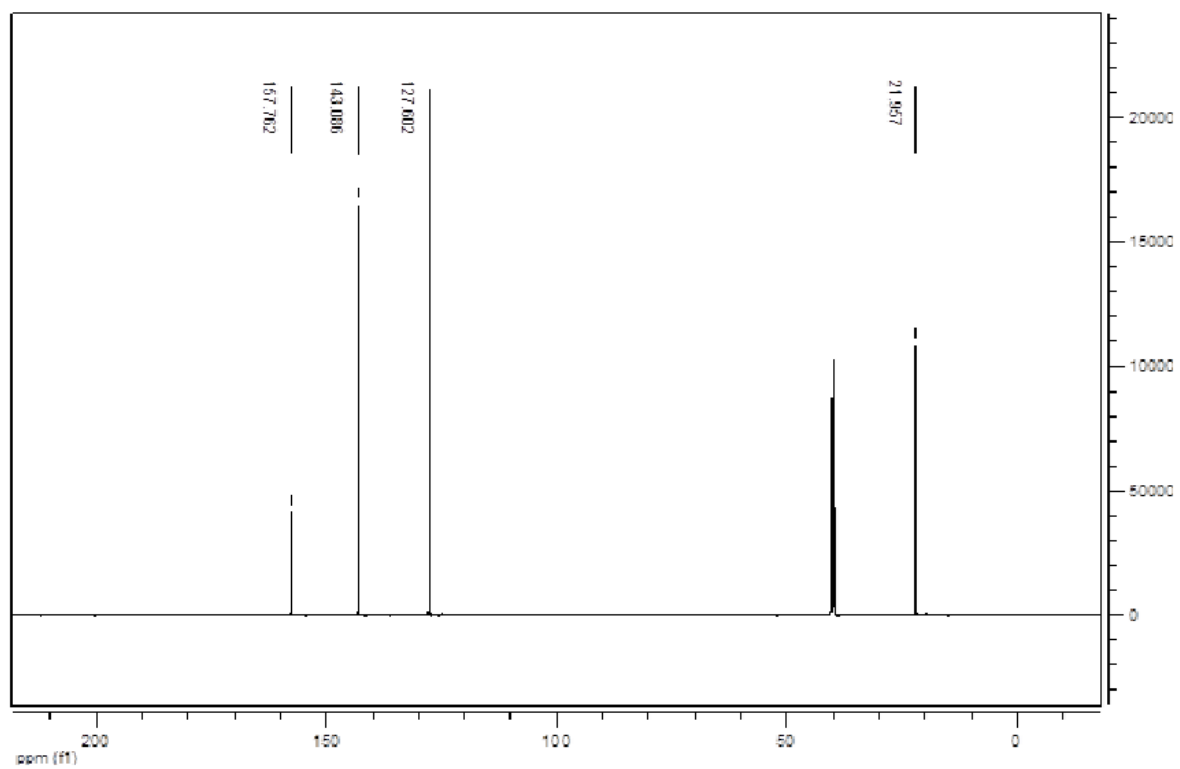

*Piperazinium hydrogensulfate* [Pi][HSO<sub>4</sub>]

<sup>1</sup>H NMR Spectra

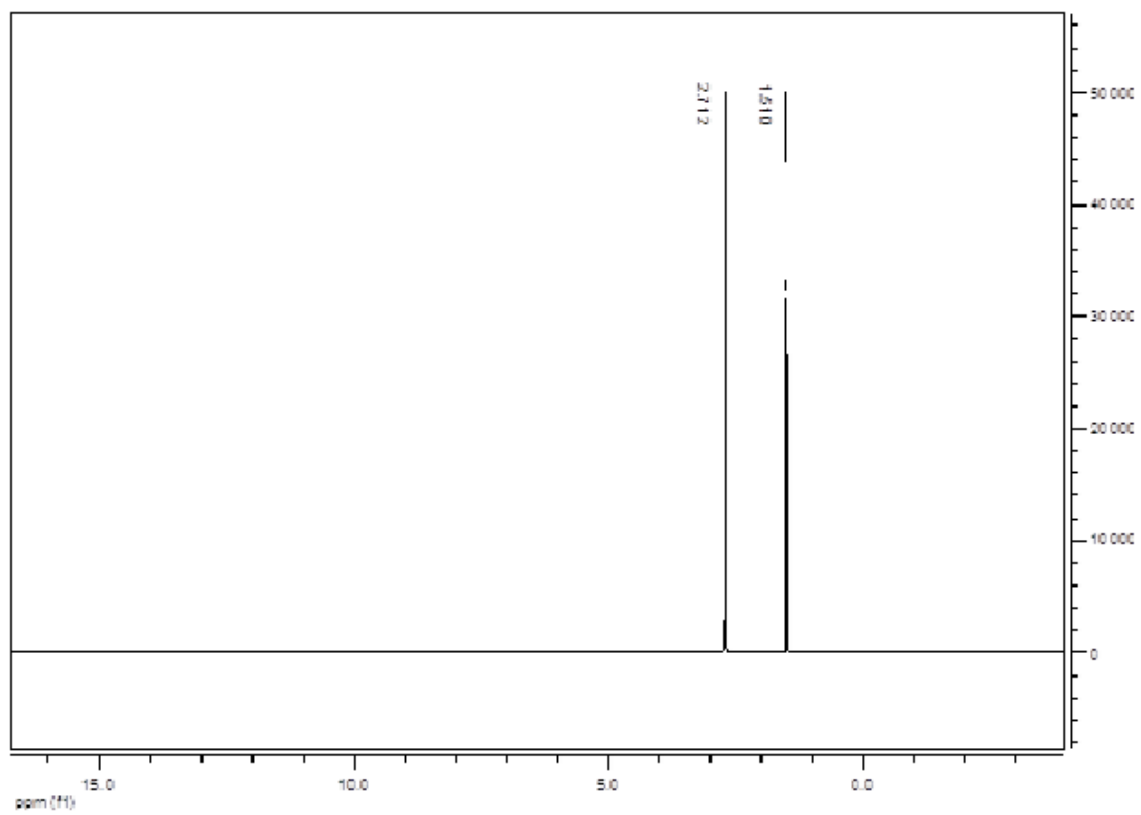

<sup>13</sup>C NMR – Spectra

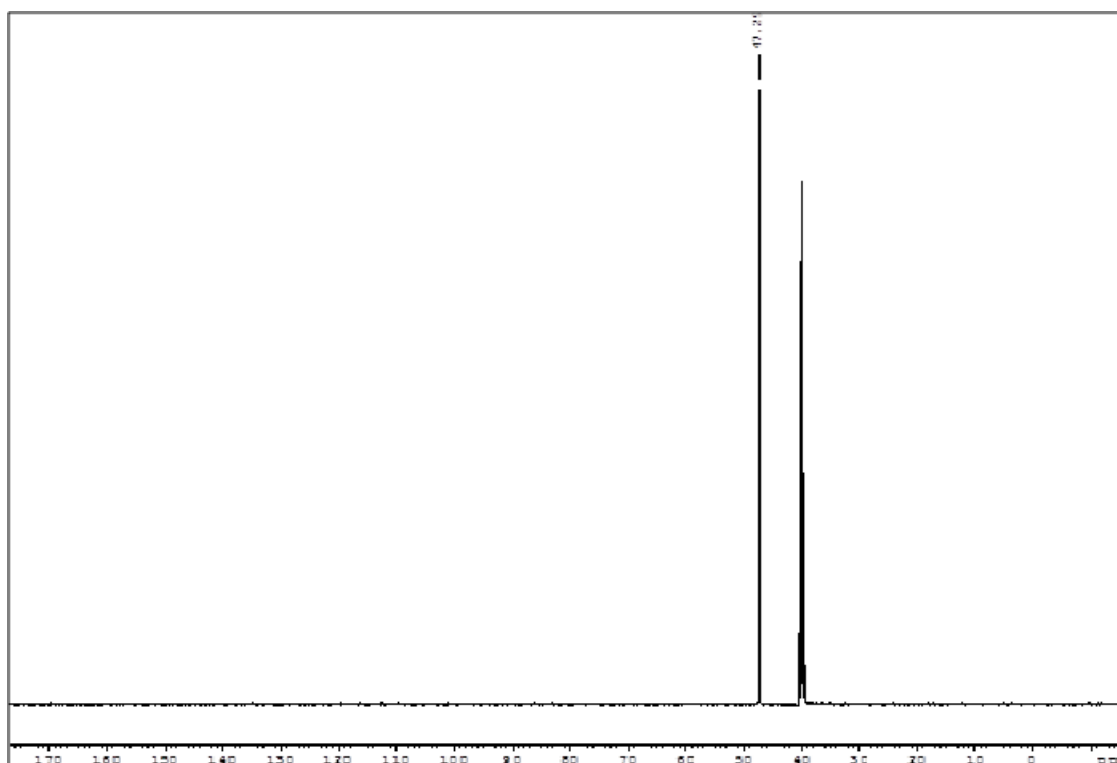





*Pyrazolium hydrogensulfate* [P][HSO<sub>4</sub>]

<sup>1</sup>H NMR Spectra

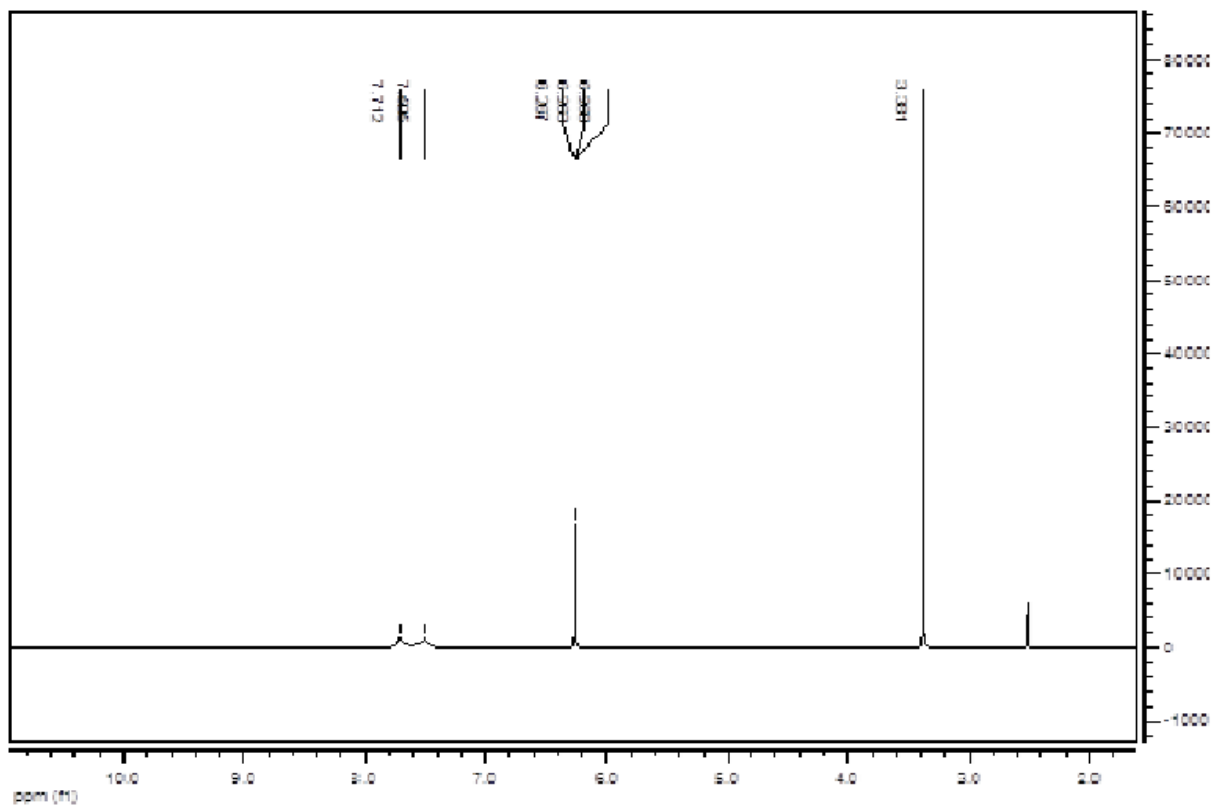

<sup>13</sup>C NMR – Spectra

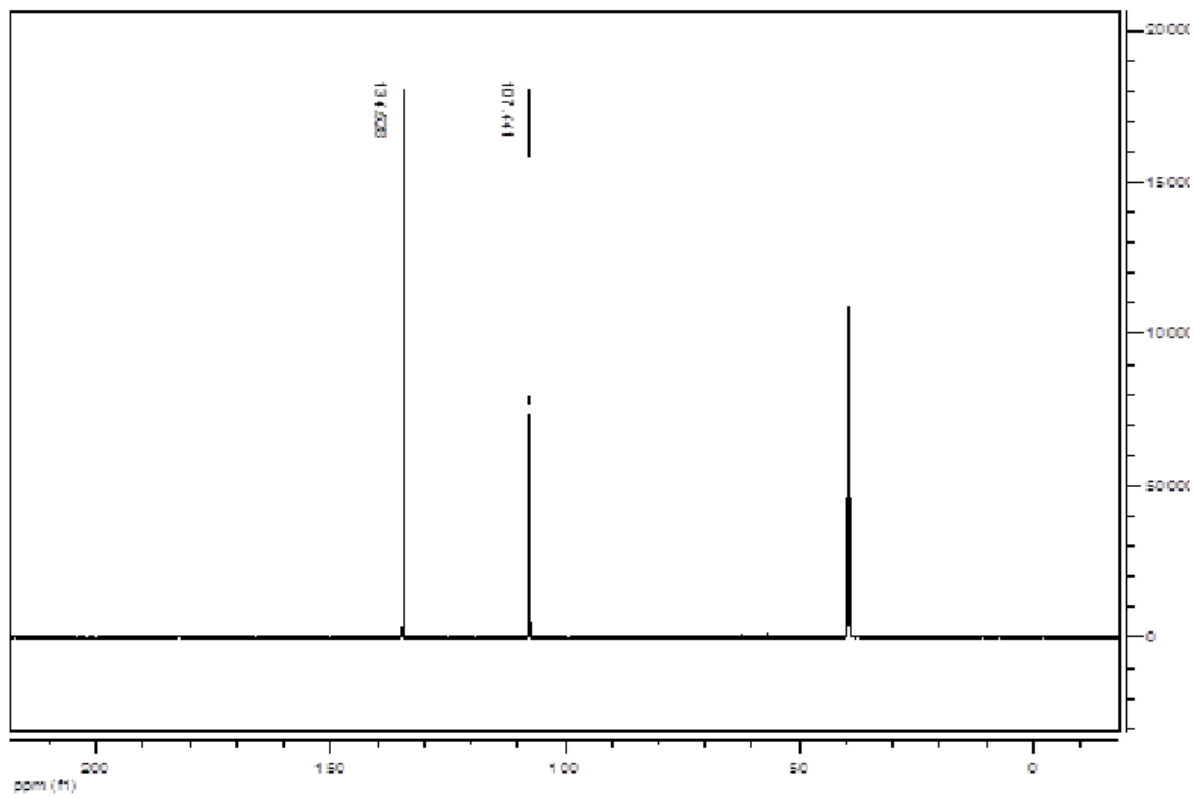

*1-methyl imidazolium hydrogensulfate* [MIM][HSO<sub>4</sub>]

<sup>1</sup>H NMR Spectra

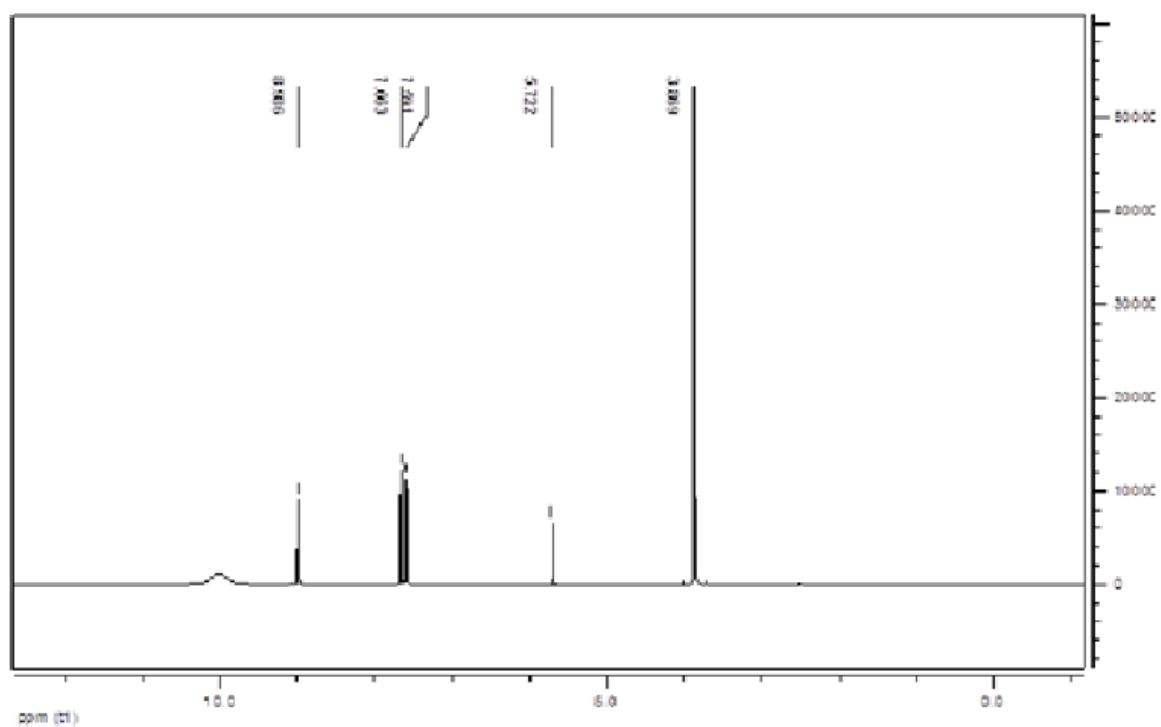

<sup>13</sup>C NMR – Spectra

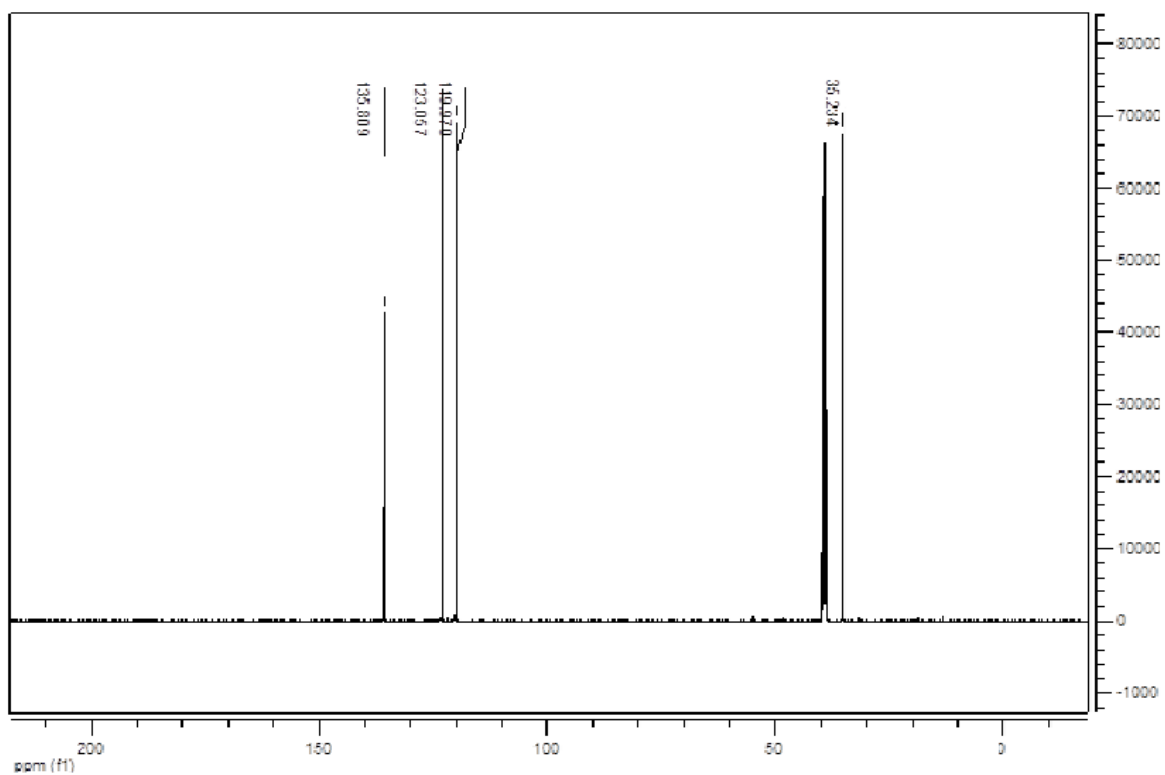

*1, 4 sultone-methyl imidazolium hydrogensulfate* [BSMIM][HSO<sub>4</sub>]

<sup>1</sup>H NMR Spectra

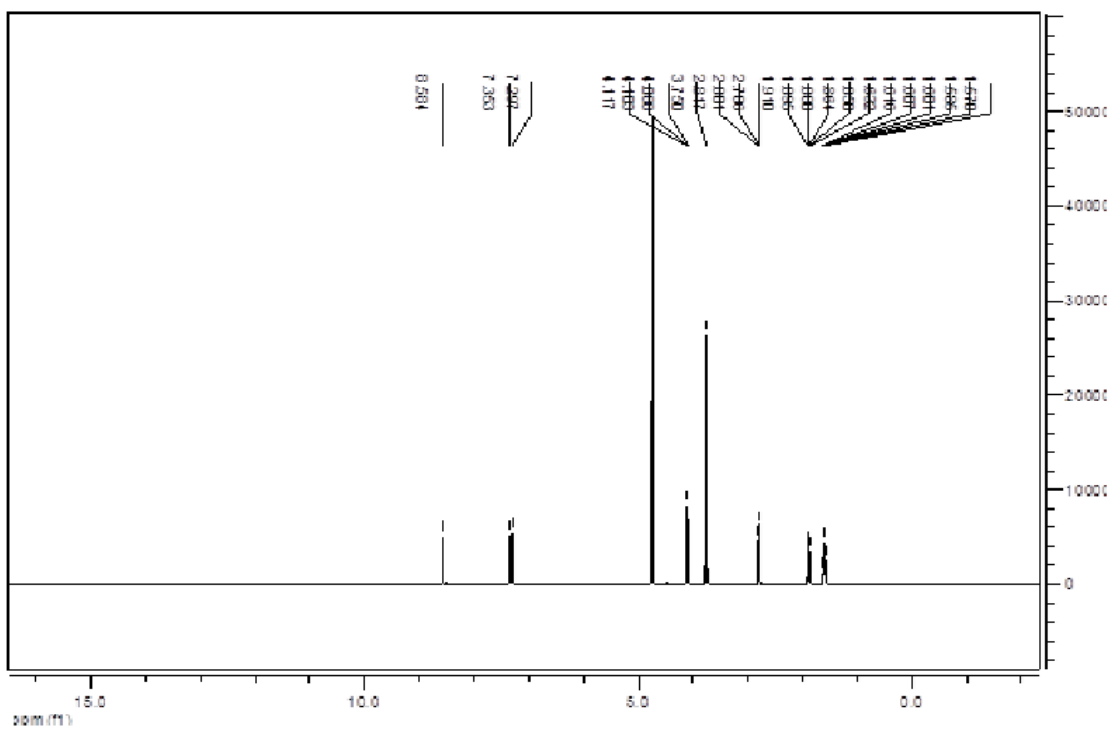

<sup>13</sup>C NMR – Spectra

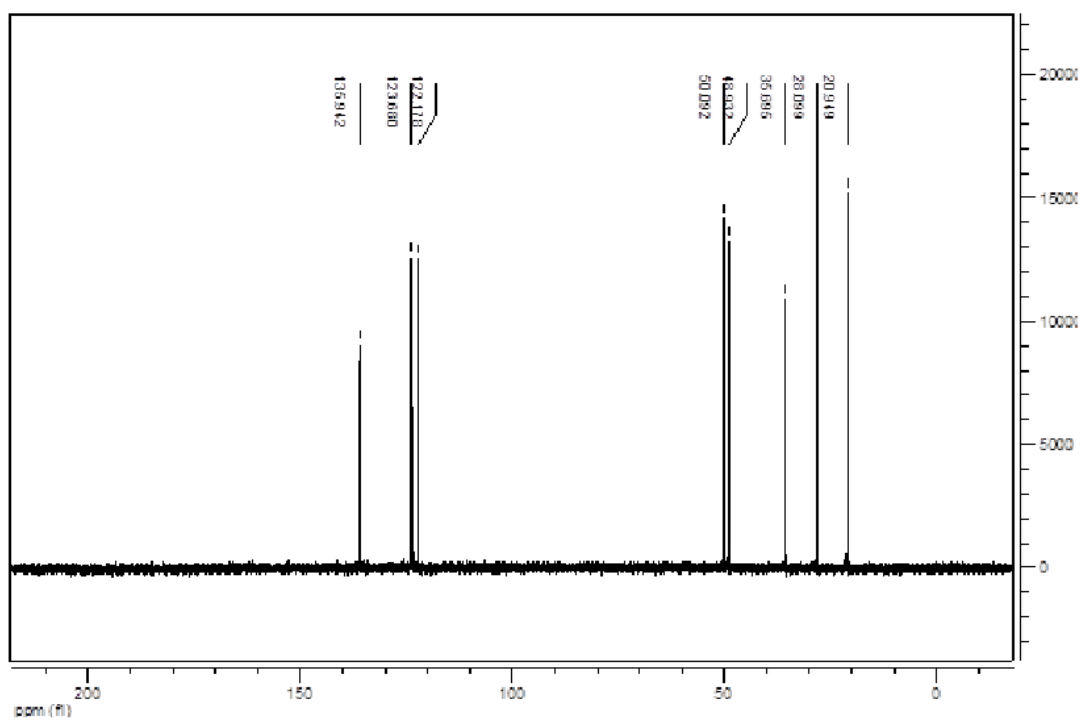



*1, 4 sultone-pyridinium hydrogensulfate [BSPy][HSO<sub>4</sub>]*

<sup>1</sup>H NMR Spectra

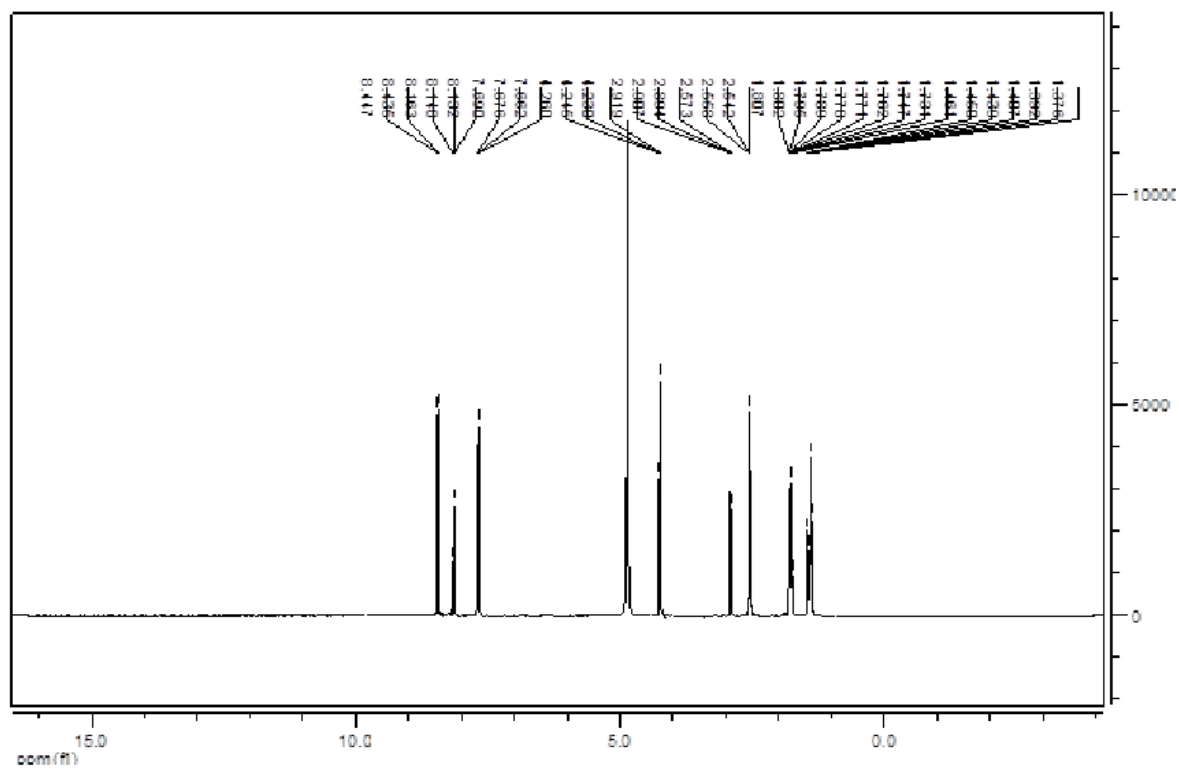

<sup>13</sup>C NMR – Spectra

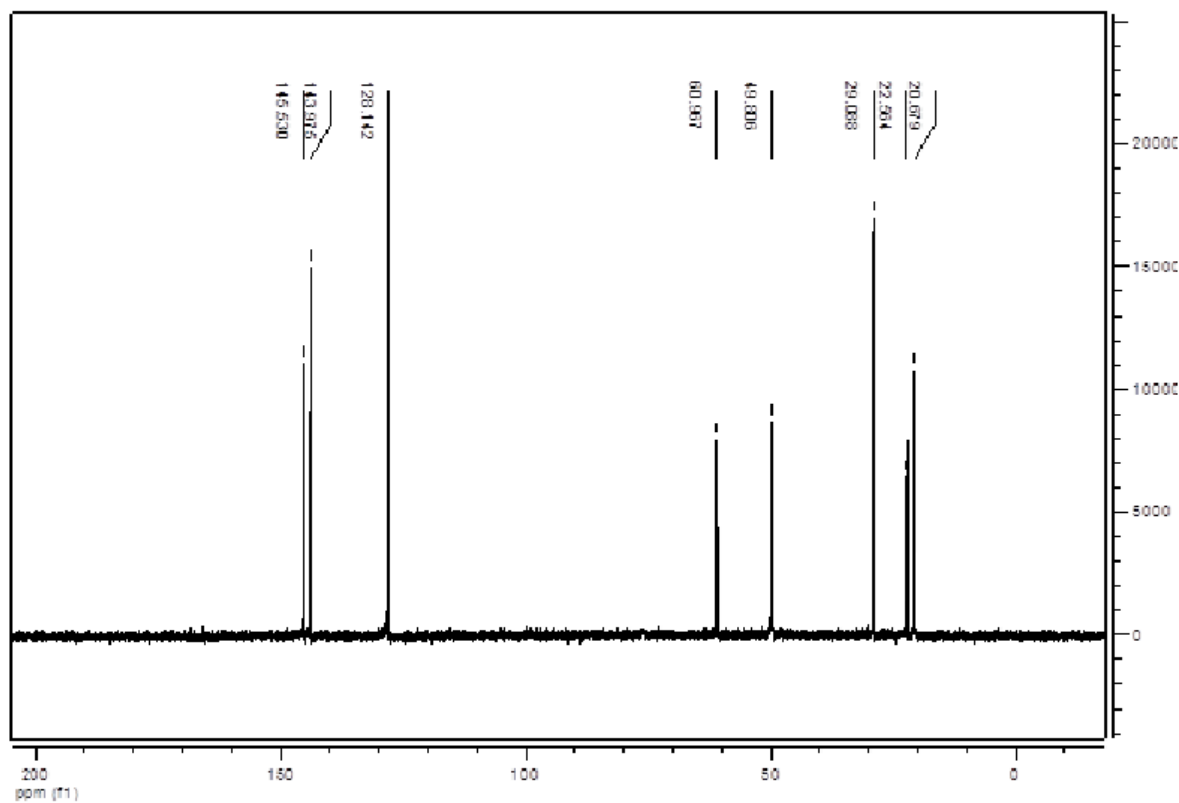





## WATER CONTENT

**Table:** Mass fraction of water  $w$  for the synthesized ILs

| ILs                                       | $10^{-6} w$ |
|-------------------------------------------|-------------|
| [MPy][HSO <sub>4</sub> ]                  | 416         |
| [MPyr][HSO <sub>4</sub> ]                 | 405         |
| [MIM][HSO <sub>4</sub> ]                  | 376         |
| [BSMIM][HSO <sub>4</sub> ]                | 398         |
| [BSPy][HSO <sub>4</sub> ]                 | 391         |
| [BSMIM][CF <sub>3</sub> SO <sub>3</sub> ] | 419         |
| [BSPy][CF <sub>3</sub> SO <sub>3</sub> ]  | 413         |

## DSC RESULTS

*1*-methyl piperidinium hydrgensulfate [MPip][HSO<sub>4</sub>],

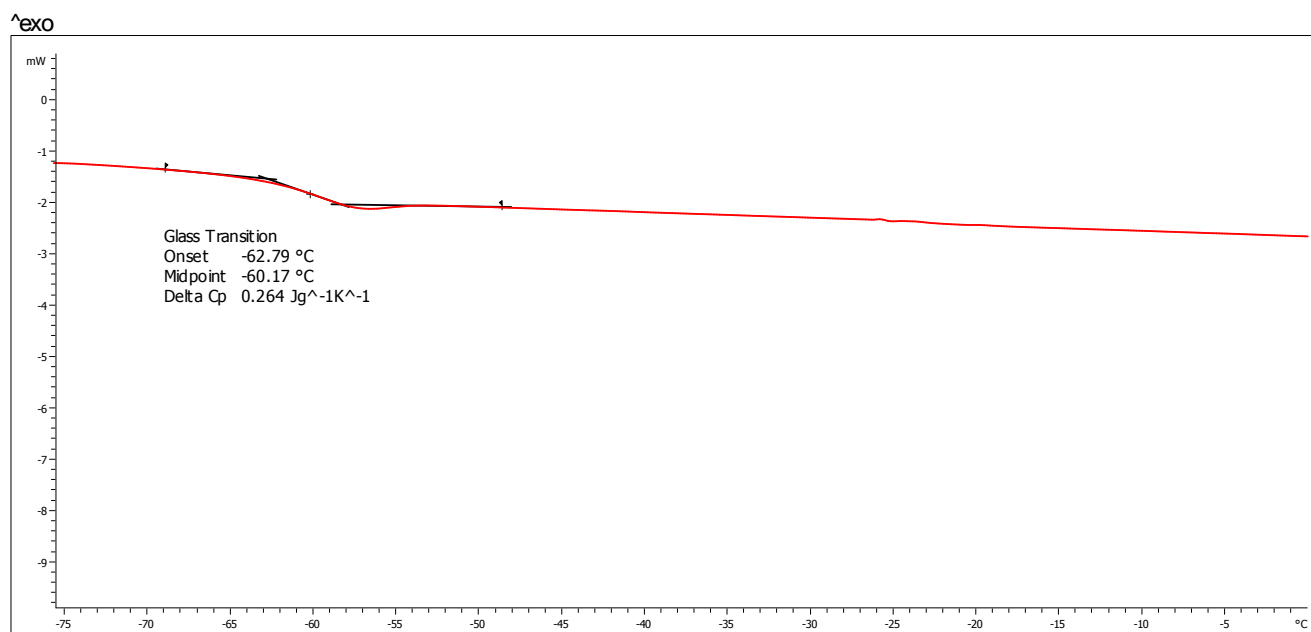

Lab: METTLER

STAR<sup>®</sup> SW9.30

4-methyl pyridinium hydrogensulfate MPy][HSO<sub>4</sub>],

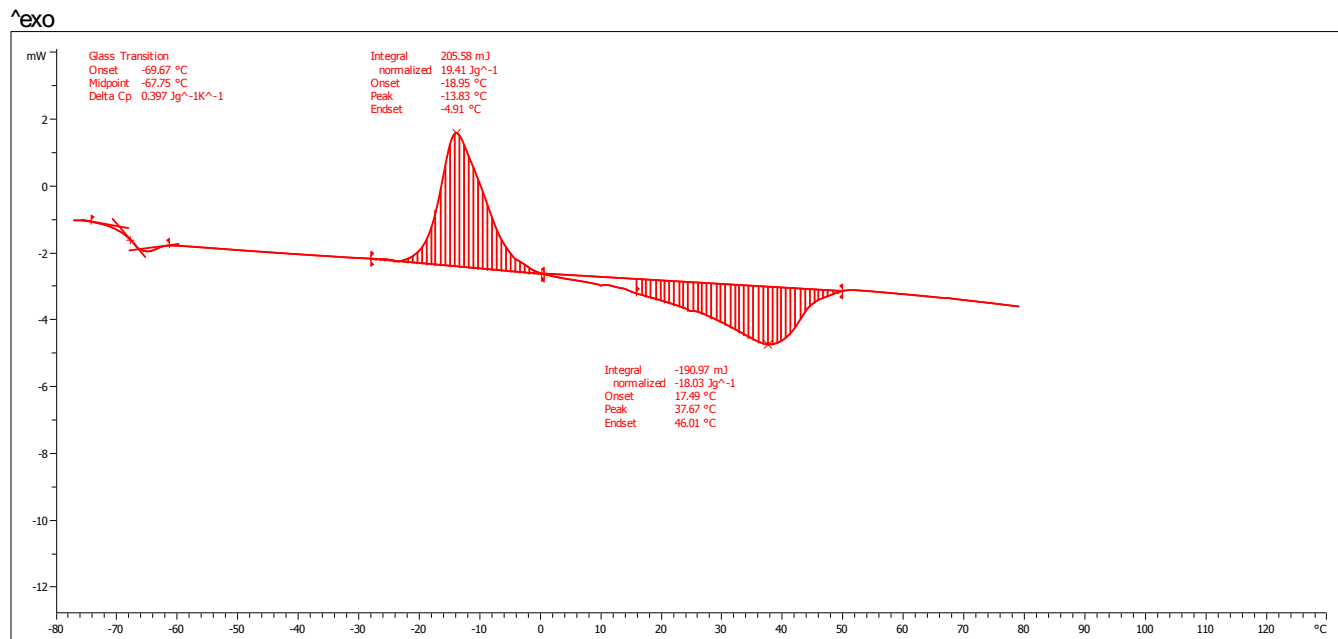

Piperazinium hydrogensulfate [Pi][HSO<sub>4</sub>],

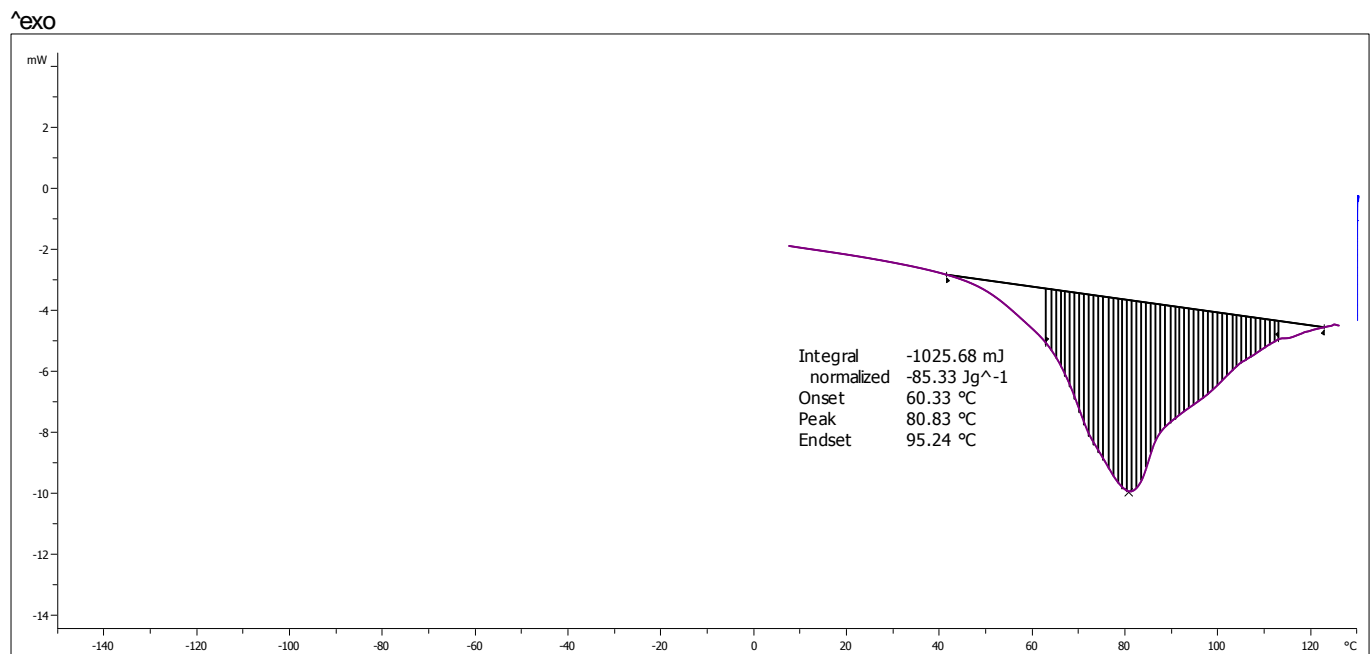

*Methyl pyrrolidinium hydrogensulfate* [MPyr][HSO<sub>4</sub>],

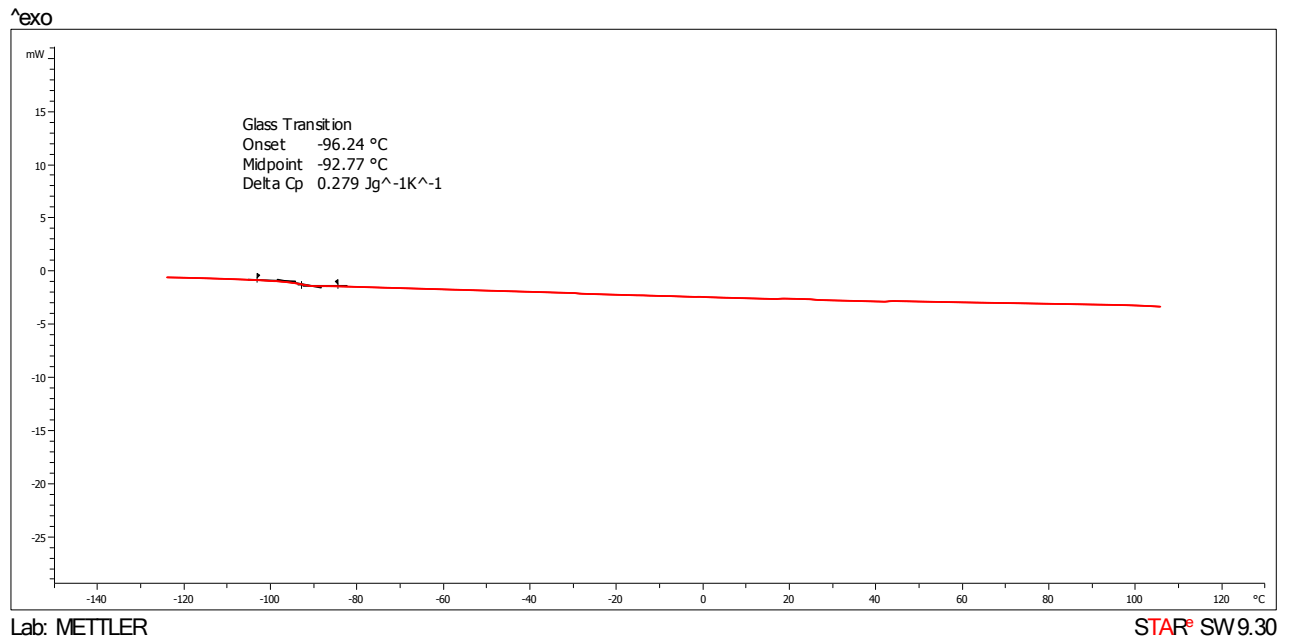

*Ethyl ammonium hydrogen sulfate* [EAm][HSO<sub>4</sub>],

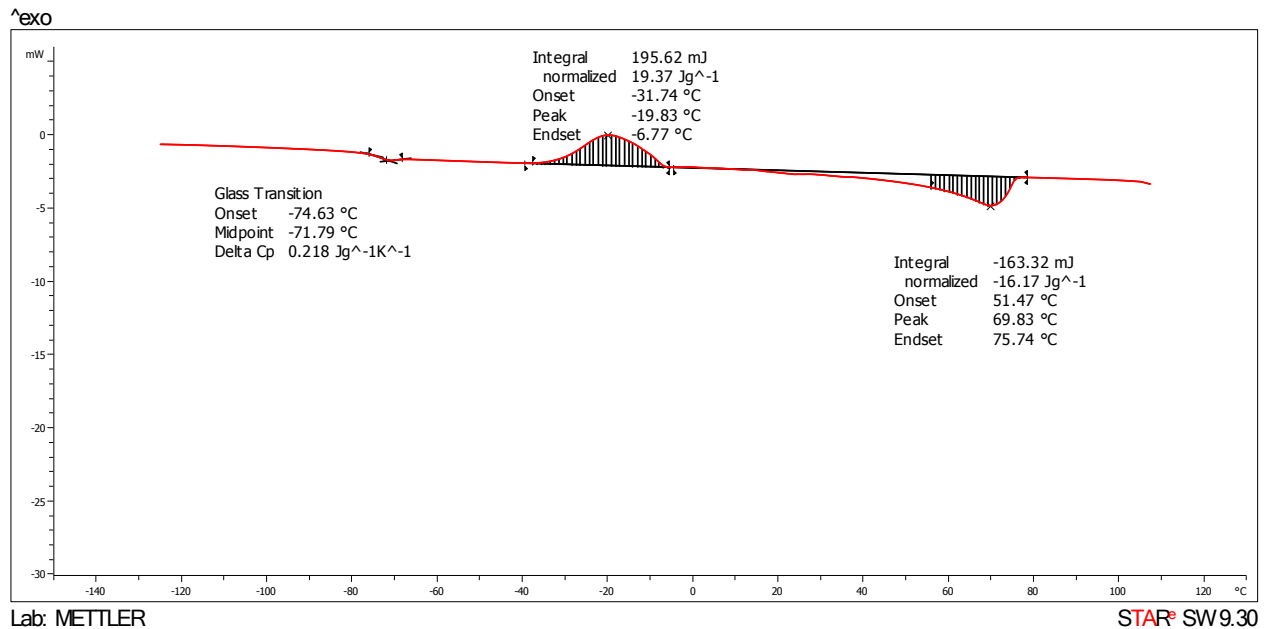

*Pyrazolium hydrogensulfate [P][HSO<sub>4</sub>],*

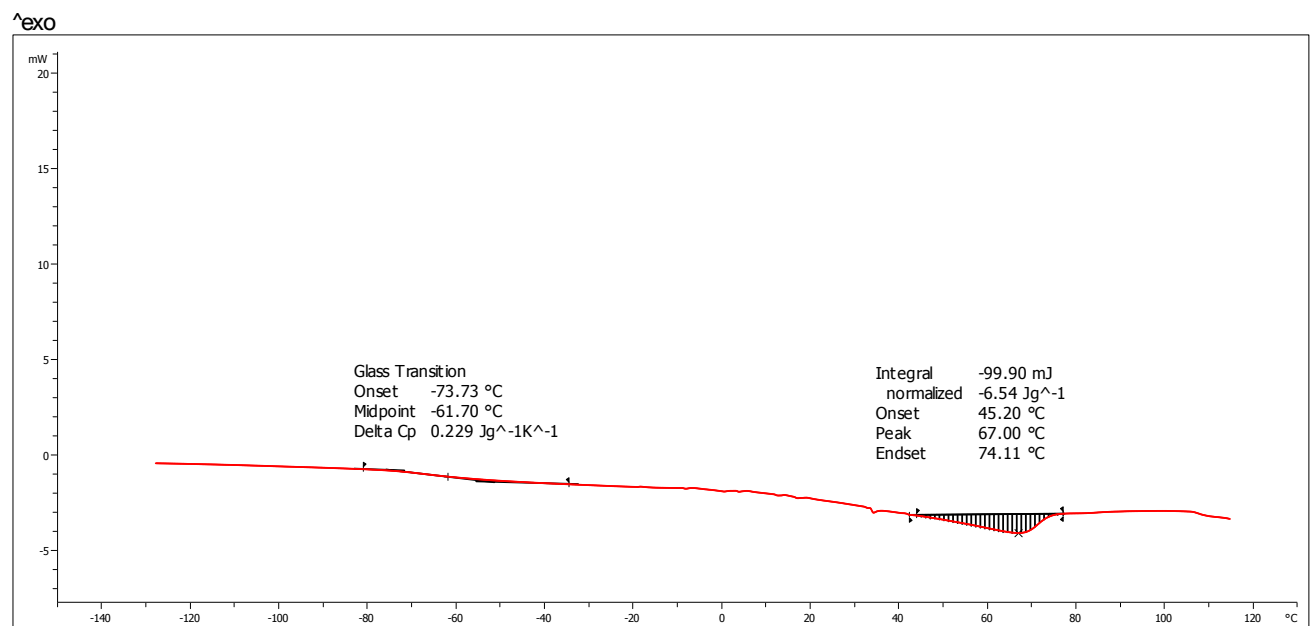

*1-methyl imidazolium hydrogensulfate [MIM][HSO<sub>4</sub>],*

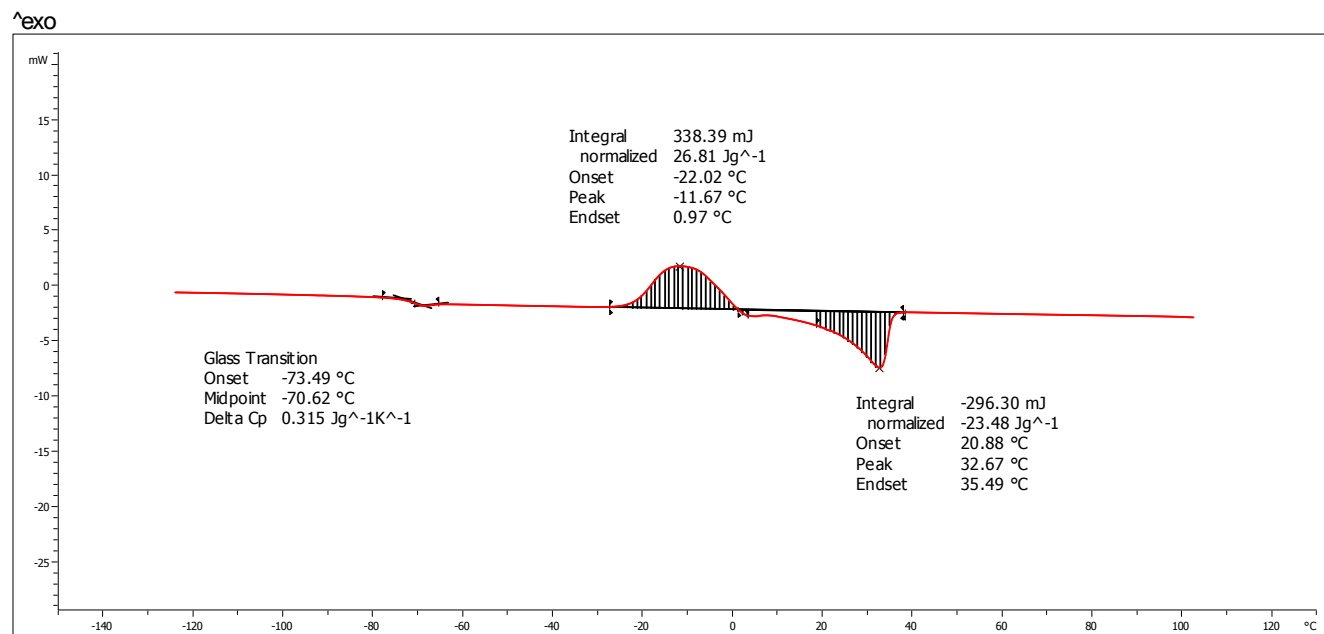

*1, 4 sultone-methyl imidazolium hydrogensulfate* [BSMIM][HSO<sub>4</sub>],

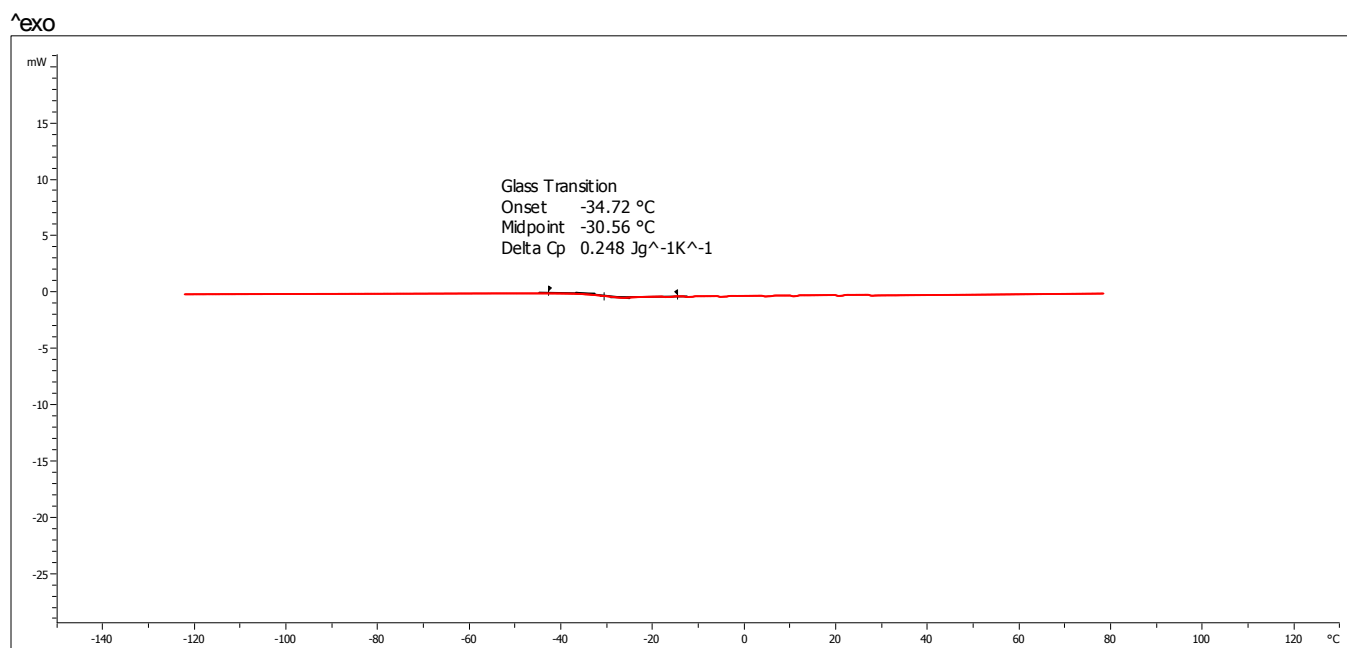

Lab: METTLER

STAR<sup>®</sup> SW9.30

*1, 4 sultone-methyl imidazolium trifluoromethanesulfonate* [BSMIM][CF<sub>3</sub>SO<sub>3</sub>],

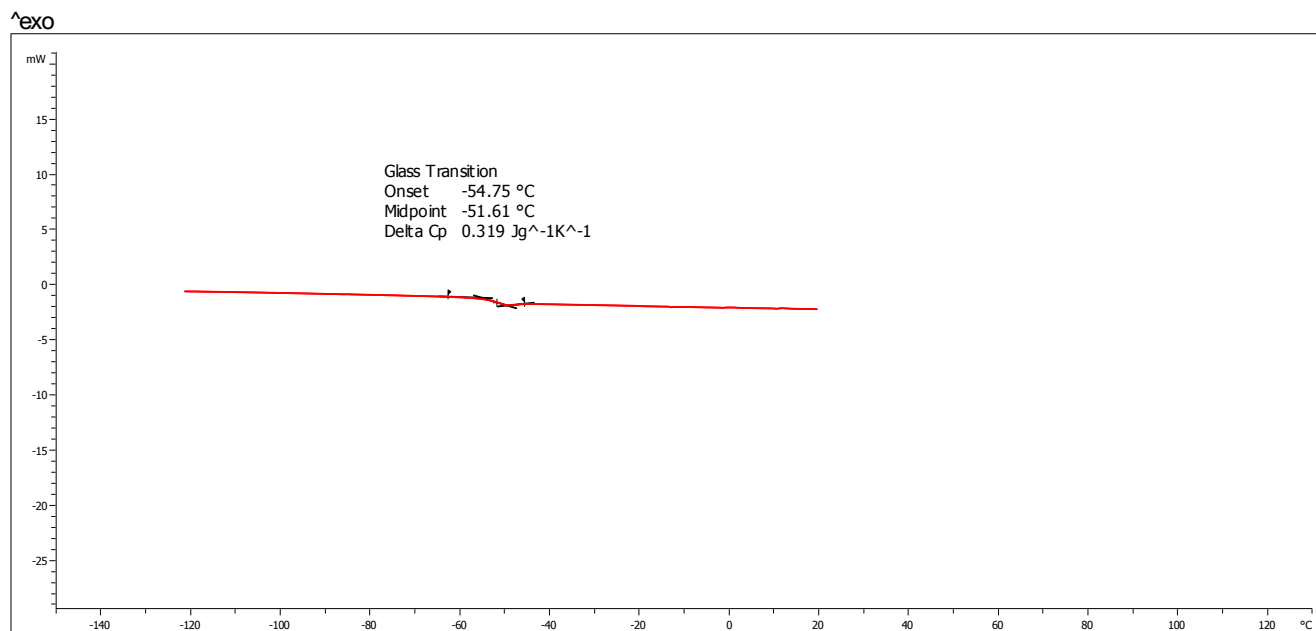

Lab: METTLER

STAR<sup>®</sup> SW9.30



*1, 4 sultone-pyridinium hydrogensulfate [BSPy][HSO<sub>4</sub>]<sup>-</sup>,*

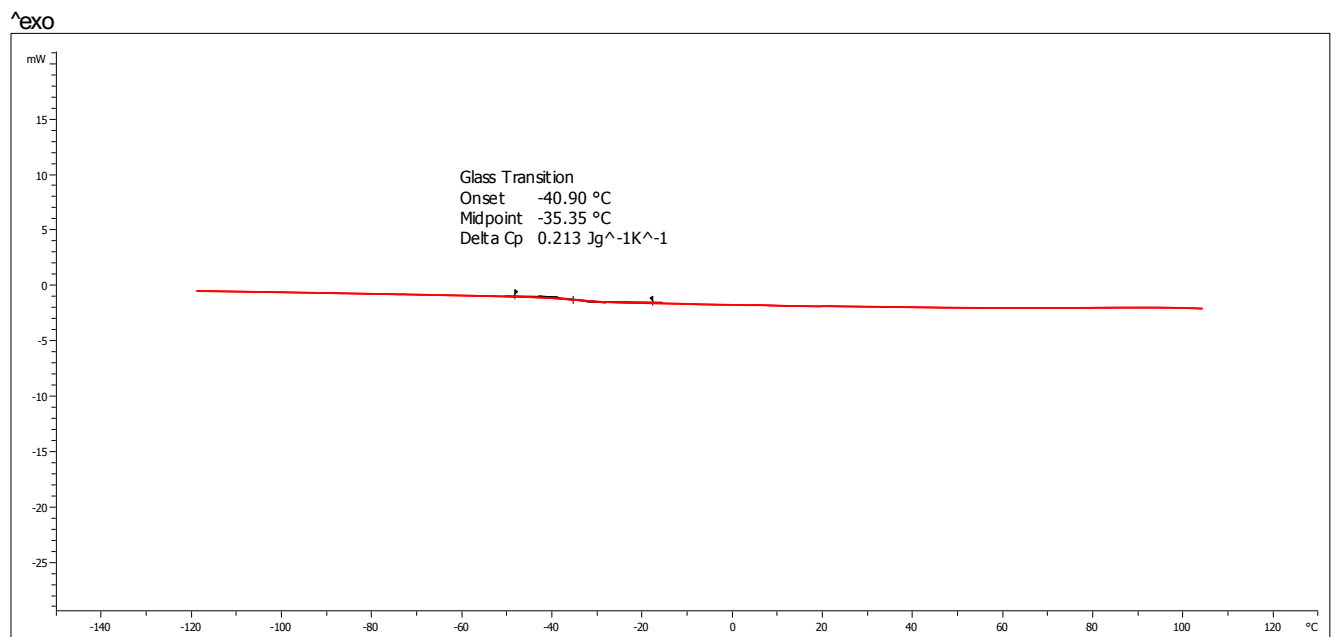

*1, 4 sultone-pyridinium triflouromethanesulfonate [BSPy][CF<sub>3</sub>SO<sub>3</sub>].*

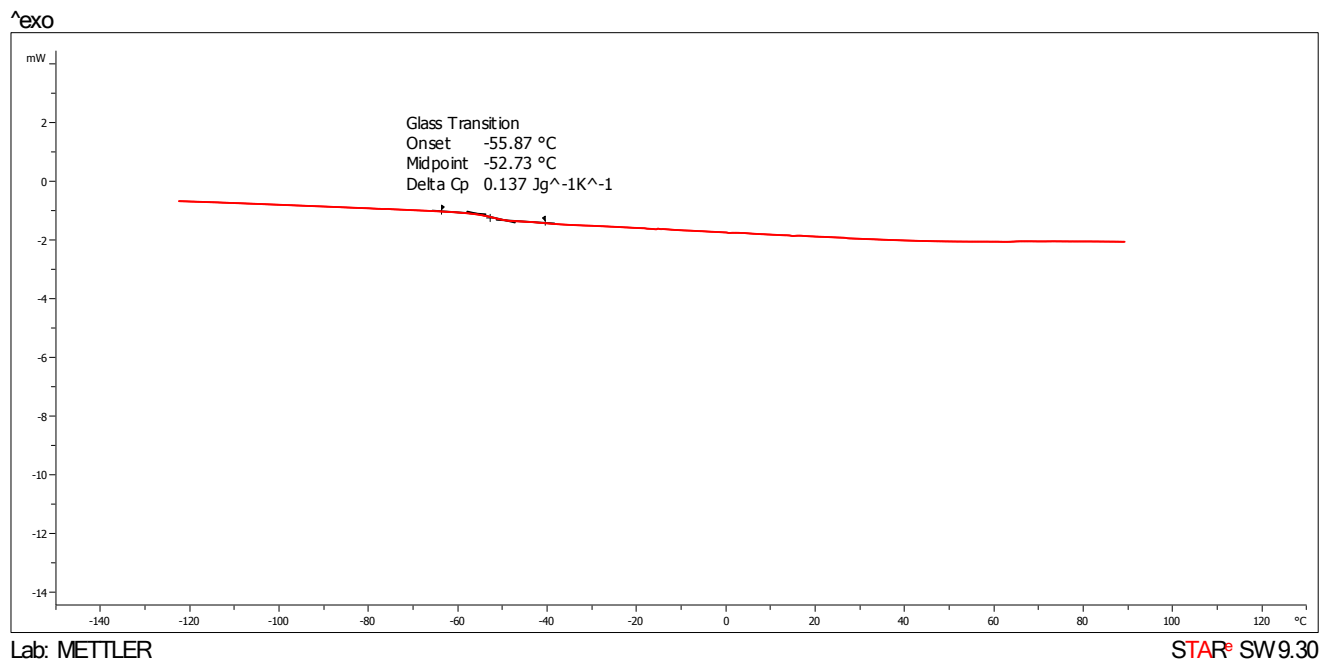

Supplement: c5ra07656k1.pdf [file c5ra07656k1.pdf]
